# Supplementary material
Source: Royal Society of Chemistry journal article supplement (doi:10.1039/d6re00093b)
Supplement: d6re00093b1.pdf [file d6re00093b1.pdf]

## Synergistic H<sub>2</sub> Activation and Structural Stabilization by Ag Doping in CoO Catalysts for Enhanced Dicyclopentadiene Hydroformylation

Yuxia Li, Tingting Ge\*, Zehao Jing, Yanxia Zheng, Yuchao Li, Ming Wang, Haofei

Huang, Cuncun Zuo\*

*Research Institute of Clean Chemical Technology, School of Chemistry and Chemical  
Engineering, Shandong University of Technology, Zibo 255049, P. R. China*

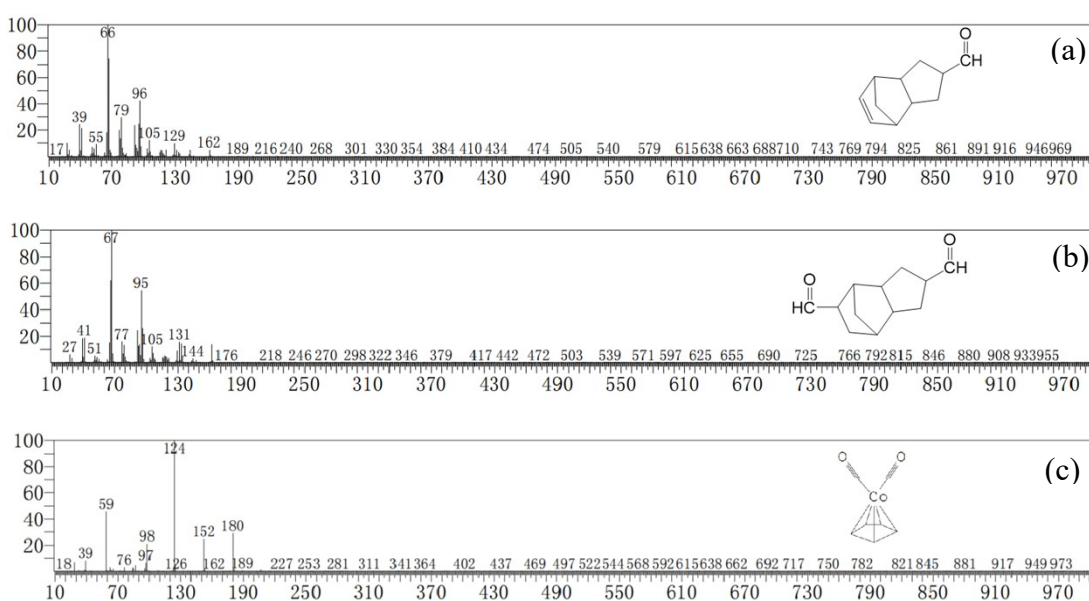

**Fig. S1.** Mass Spectrometry of Products: TCDMA Mass Spectrometry (a), TCDDA mass spectrometry (b) and mass spectrometry of reduced Co catalyst intermediate (c).

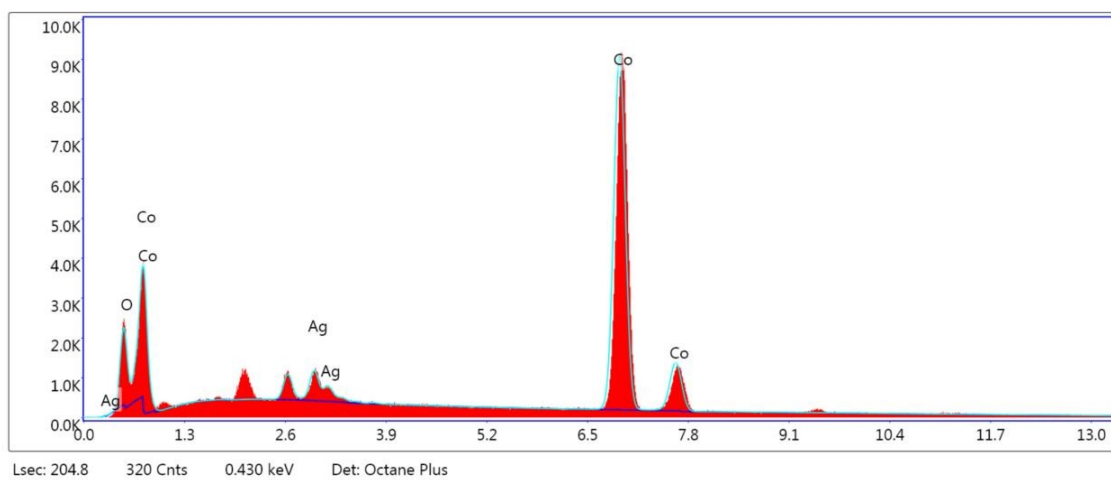

**Fig. S2.** EDS spectrum of Ag/CoO

**Table S1.** Ratio results of different elements in Ag/CoO.

| Eleme | Weight | Atomic % | Net Int. | Error % | Kratio | Z      | A      | F      |
|-------|--------|----------|----------|---------|--------|--------|--------|--------|
| O K   | 8.98   | 27.07    | 109.80   | 7.91    | 0.0473 | 1.2660 | 0.4158 | 1.0000 |
| AgL   | 4.08   | 1.82     | 53.60    | 3.96    | 0.0356 | 0.8777 | 0.9904 | 1.0044 |
| CoK   | 86.94  | 71.11    | 786.70   | 1.77    | 0.8474 | 0.9751 | 0.9976 | 1.0019 |

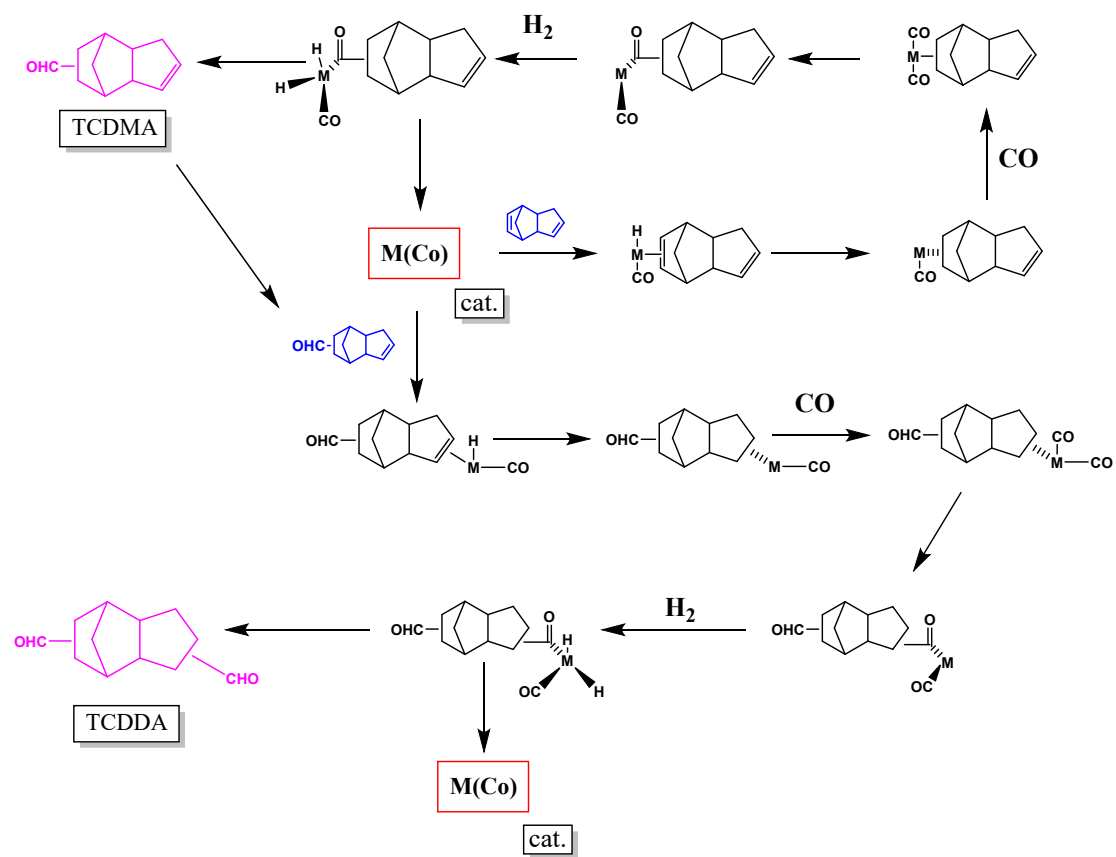

**Fig. S3.** Schematic Diagram of the Potential Mechanism for Co-Catalyzed Hydroformylation of DCPD.

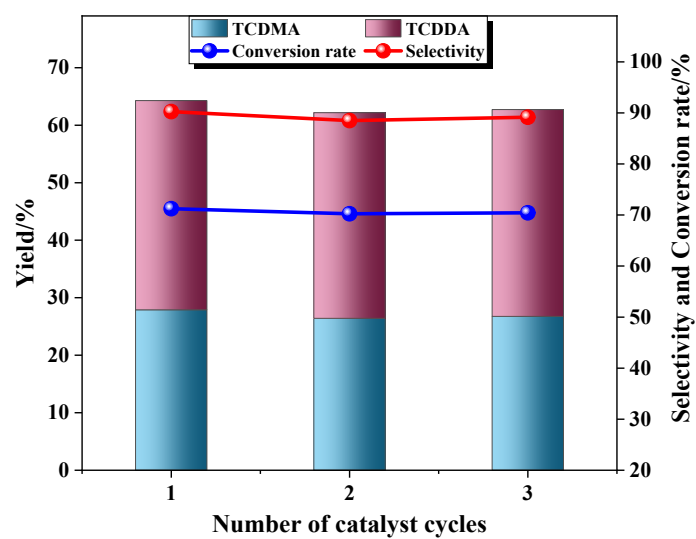

**Fig. S4.** Analysis of the Reusability of Ag/CoO Catalysts.
